# Supplementary material for: KRAS gene polymorphisms are associated with the risk of glioma: a two-center case-control study
Source: PubMed Central journal article supplement — Transl Pediatr. 2021 Mar;10(3):579–86. doi: 10.21037/tp-20-359 (PMC8039792; doi:10.21037/tp-20-359), 2021-03
Supplement: tp-10-03-579-supplementary.pdf [file tp-10-03-579-supplementary.pdf]

**Table S1** Frequency distribution of selected variables in glioma patients and cancer-free controls

| Variables                               | Cases (N=191) |       | Controls (N=248) |       | P <sup>a</sup> |
|-----------------------------------------|---------------|-------|------------------|-------|----------------|
|                                         | No.           | %     | No.              | %     |                |
| Age range, month                        | 2.60–168.00   |       | 4.00–168.00      |       | 0.997          |
| Mean ± SD                               | 62.74±47.28   |       | 53.90±33.47      |       |                |
| <60                                     | 97            | 50.79 | 126              | 50.81 | 0.329          |
| ≥60                                     | 94            | 49.21 | 122              | 49.19 |                |
| Gender                                  |               |       |                  |       | 0.329          |
| Female                                  | 89            | 46.60 | 104              | 41.94 |                |
| Male                                    | 102           | 53.40 | 144              | 58.06 |                |
| Subtypes                                |               |       |                  |       |                |
| Astrocytic tumors                       | 136           | 71.20 | –                | –     |                |
| Ependymoma                              | 33            | 17.28 | –                | –     |                |
| Neuronal and mixed neuronal-glia tumors | 14            | 7.33  | –                | –     |                |
| Embryonal tumors                        | 7             | 3.66  | –                | –     |                |
| NA                                      | 1             | 0.52  | –                | –     |                |
| WHO stages                              |               |       |                  |       |                |
| I                                       | 110           | 57.59 | –                | –     |                |
| II                                      | 38            | 19.90 | –                | –     |                |
| III                                     | 17            | 8.90  | –                | –     |                |
| IV                                      | 25            | 13.09 | –                | –     |                |
| NA                                      | 1             | 0.52  | –                | –     |                |

SD, standard deviation; NA, not available. <sup>a</sup>Two-sided  $\chi^2$  test for distributions between glioma patients and cancer-free controls.
